# Supplementary material for: Can Circulating Cardiac Biomarkers Be Helpful in the Assessment of LMNA Mutation Carriers?
Source: PubMed Central journal article supplement (PMC7290314; doi:10.3390/jcm9051443), 2020-05-12
Supplement: jcm-09-01443-s001.pdf [file jcm-09-01443-s001.pdf]

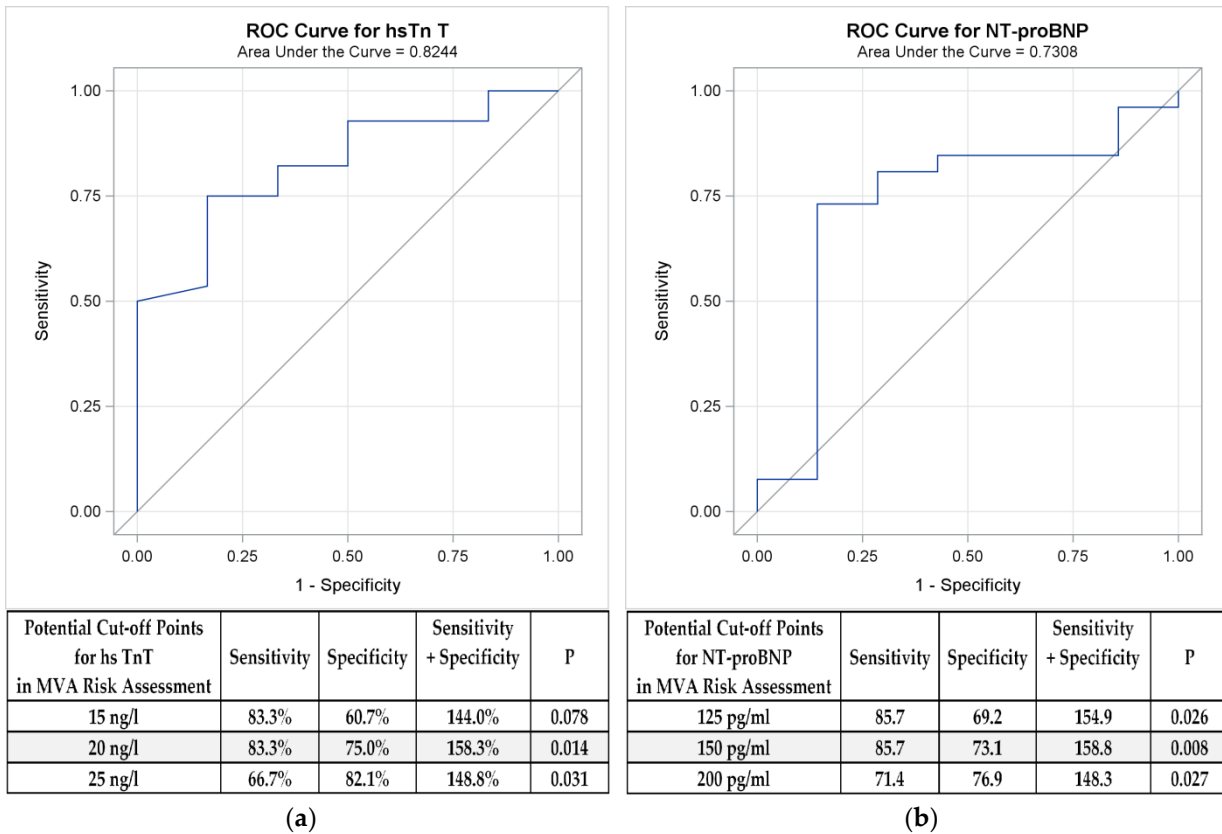

**Figure S1.** Receiver-operating characteristic curves used to assess the cutoff points of the biomarkers for prediction of MVA: (a) for hs TnT and (b) for NT-proBNP. Legend: hs TnT: highly sensitive Troponin T; MVA: malignant ventricular arrhythmia; NT-proBNP: N-terminal prohormone brain natriuretic peptide; ROC: receiver-operating characteristic.

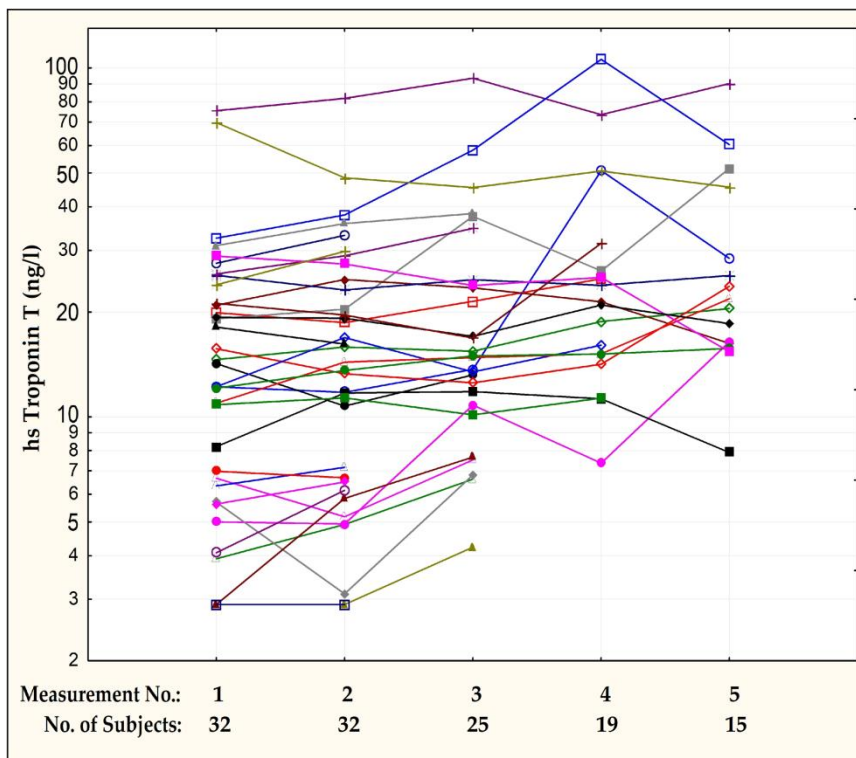

**Figure S2.** Highly sensitive troponin T level profiles at baseline and during follow-up visits on a logarithmic scale.

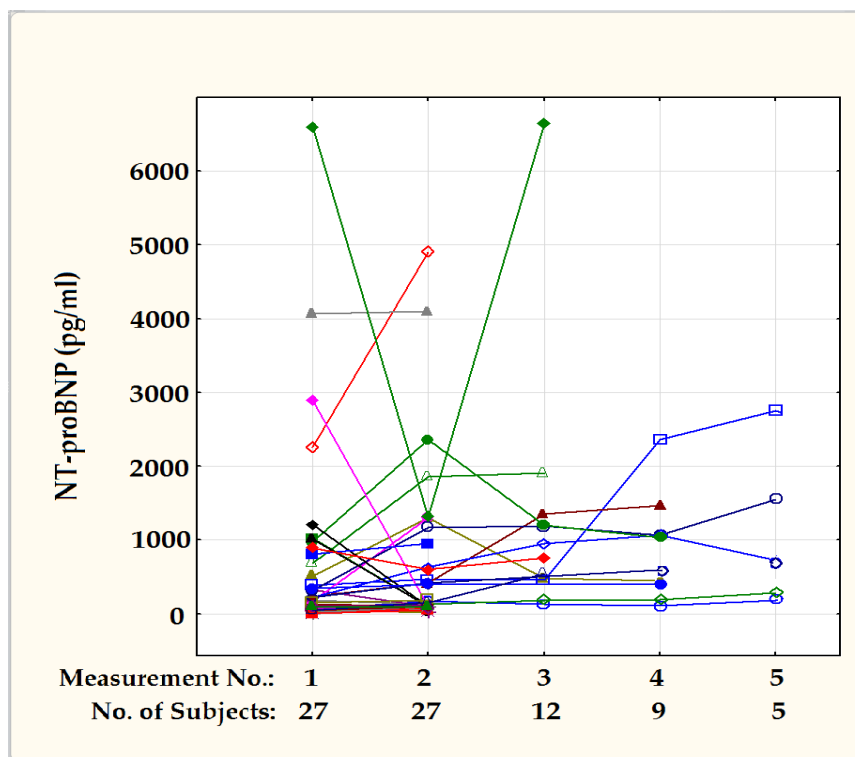

**Figure S3.** N-terminal pro-brain natriuretic peptide level profiles at baseline and during follow-up visits.

**Table S4.** Baseline clinical characteristics of *LMNA* variant carriers at initial visit according to mutation type.

|                                                                 | Non-Missens <i>n</i> = 40 | Missense <i>n</i> = 13 | <i>p</i>     |
|-----------------------------------------------------------------|---------------------------|------------------------|--------------|
| Age (years)                                                     | 34.0 ± 13.2               | 30.7 ± 9.5             | 0.405        |
| Symptoms                                                        |                           |                        |              |
| Syncope, <i>n</i> (%) ( <i>n</i> = 49)                          | 8 (21.6%)                 | 4 (33.3%)              | 0.454        |
| Family history of SCD < 60 years, <i>n</i> (%) ( <i>n</i> = 50) | 20 (51.3%)                | 5 (45.4%)              | 0.733        |
| Heart failure, <i>n</i> (%)                                     | 12 (30.0%)                | 7 (53.8%)              | 0.183        |
| NYHA class ≥ 3, <i>n</i> (%)                                    | 4 (10.0%)                 | 3 (23.1%)              | 0.343        |
| Arrhythmias                                                     |                           |                        |              |
| Atrial arrhythmias, <i>n</i> (%) ( <i>n</i> = 52)               | 16 (41.0%)                | 3 (23.1%)              | 0.328        |
| nsVT, <i>n</i> (%) ( <i>n</i> = 50)                             | 22 (56.4%)                | 8 (72.7%)              | 0.489        |
| SCA/sVT, <i>n</i> (%) ( <i>n</i> = 50)                          | 5 (13.2%)                 | 4 (33.3%)              | 0.191        |
| CCD                                                             |                           |                        |              |
| LBBB, <i>n</i> (%) ( <i>n</i> = 47)                             | 4 (11.1%)                 | 4 (36.4%)              | 0.073        |
| AV block (≥ 1), <i>n</i> (%) ( <i>n</i> = 52)                   | 26 (65.0%)                | 5 (41.7%)              | 0.188        |
| Cardiomyopathies                                                |                           |                        |              |
| LVEF < 50%, <i>n</i> (%)                                        | 11 (27.5%)                | 8 (61.5%)              | <b>0.044</b> |
| LVEF (%)                                                        | 53.7 ± 14.0               | 40.5 ± 19.1            | <b>0.009</b> |
| LVE > 112%, <i>n</i> (%)                                        | 18 (45.0%)                | 10 (76.9%)             | <b>0.045</b> |
| LVEDD (mm)                                                      | 52.6 ± 7.7                | 57.2 ± 11.0            | 0.102        |
| Biomarkers                                                      |                           |                        |              |
| CK [IU/l] ( <i>n</i> = 46)                                      | 176.0 (98–376)            | 85.0 (78–121)          | <b>0.026</b> |
| elevated CK, <i>n</i> (%) ( <i>n</i> = 46)                      | 13/37 (35.1%)             | 0/9 (0%)               | <b>0.044</b> |
| hs Troponin T (ng/L) ( <i>n</i> = 42)                           | 14.2 (9.9–25.4)           | 8.2 (5.0–14.6)         | 0.232        |
| elevated hs Troponin T, <i>n</i> (%) ( <i>n</i> = 42)           | 17 (51.5%)                | 3 (33.3%)              | 0.495        |

|                                                   |                |                 |              |
|---------------------------------------------------|----------------|-----------------|--------------|
| NT-proBNP (pg/mL) ( <i>n</i> = 42)                | 129.5 (54–684) | 225.0 (95–1029) | 0.345        |
| Elevated NT-proBNP, <i>n</i> (%) ( <i>n</i> = 42) | 16 (51.6%)     | 7 (63.6%)       | 0.726        |
| Comorbidities                                     |                |                 |              |
| Coronary artery disease, <i>n</i> (%)             | 2 (5.0%)       | 0 (0%)          | 1.000        |
| Hypertension, <i>n</i> (%)                        | 6 (15.0%)      | 0 (0%)          | 0.317        |
| Implantable devices                               |                |                 |              |
| ICD in primary PPX, <i>n</i> (%)                  | 4 (10.0%)      | 4 (30.8%)       | 0.090        |
| ICD in secondary PPX, <i>n</i> (%)                | 5 (12.5%)      | 3 (23.1%)       | 0.389        |
| ICD/CRT-D implantation, <i>n</i> (%)              | 9 (22.5%)      | 7 (53.8%)       | <b>0.044</b> |
| Medication                                        |                |                 |              |
| β-Blocker, <i>n</i> (%)                           | 17 (42.5%)     | 8 (61.5%)       | 0.232        |
| ACE-I or ARB, <i>n</i> (%)                        | 14 (35.0%)     | 7 (53.8%)       | 0.227        |
| MRA, <i>n</i> (%)                                 | 4 (10.0%)      | 2 (15.4%)       | 0.627        |

Legend: Number of subjects is expressed as *n* (%). Continuous variables are shown as mean ± SD or median and quartiles (Q1:25th–Q2:75th percentiles). ACE-I: angiotensin converting enzyme inhibitor; ARB: angiotensin receptor blocker; AV block: atrioventricular block; CCD: cardiac conduction defect; CK: creatine phosphokinase; CRT-D: cardiac resynchronization therapy defibrillator; hs: high sensitive; ICD: implantable cardioverter defibrillator; LBBB: left bundle branch block; LVE: left ventricular enlargement; LVEDD: left ventricular end-diastolic dimension; LVEF: left ventricular ejection fraction; MRA: mineralocorticoid receptor antagonist; nsVT: non-sustained ventricular tachycardia; NT-proBNP: N-terminal pro-brain natriuretic peptide; NYHA class: New York Heart Association functional class; PPX: prophylaxis; SCA: sudden cardiac arrest; SCD: sudden cardiac death; sVT: sustained ventricular tachycardia.

**Table S5.** Comparison of outcome according to diagnosis at initial visit.

| Outcome            | DCM/HNDC<br><i>n</i> = 22 | Indeterminate<br>CM <i>n</i> = 21 | No CM<br><i>n</i> = 10 | <i>p</i>     |
|--------------------|---------------------------|-----------------------------------|------------------------|--------------|
| End-Stage HF       | 14 (63.6%)                | 0 (0%)                            | 0 (0%)                 | <0.0001      |
| MVA                | 9 (40.9%)                 | 4 (19.0%)                         | 0 (0%)                 | <b>0.034</b> |
| MVA + End-Stage HF | 19 (86.4%)                | 4 (19.0%)                         | 0 (0%)                 | <0.0001      |

Legend: CM: cardiomyopathy; DCM: dilated cardiomyopathy; HF: heart failure; HNDC: hypokinetic non-dilated cardiomyopathy; MVA: malignant ventricular arrhythmia.

**Table S6.** Clinical characteristics of *LMNA* variant carriers at last follow-up according to proband status.

|                                                   | Probands <i>n</i> = 21 | Relatives <i>n</i> = 32 | <i>p</i>     |
|---------------------------------------------------|------------------------|-------------------------|--------------|
| Age (years)                                       | 44.2 ± 10.3            | 34.9 ± 12.6             | <b>0.007</b> |
| Symptoms                                          |                        |                         |              |
| Heart failure, <i>n</i> (%)                       | 19 (90.5%)             | 8 (25.0%)               | <0.0001      |
| NYHA class ≥ 3, <i>n</i> (%)                      | 14 (66.7%)             | 3 (9.4%)                | <0.0001      |
| Arrhythmias                                       |                        |                         |              |
| Atrial arrhythmias, <i>n</i> (%) ( <i>n</i> = 52) | 14 (66.7%)             | 10 (32.3%)              | <b>0.015</b> |
| nsVT, <i>n</i> (%) ( <i>n</i> = 51)               | 19 (90.5%)             | 16 (50.0%)              | <b>0.002</b> |
| CCD                                               |                        |                         |              |
| LBBB, <i>n</i> (%) ( <i>n</i> = 39)               | 9 (64.3%)              | 1 (4.0%)                | <0.0001      |
| AV block (≥ 1°), <i>n</i> (%)                     | 19 (90.5%)             | 17 (53.1%)              | <b>0.004</b> |
| Cardiomyopathies                                  |                        |                         |              |
| LVEF < 50%, <i>n</i> (%)                          | 18 (85.7%)             | 4 (12.5%)               | <0.0001      |

|                                                       |                  |                   |                   |
|-------------------------------------------------------|------------------|-------------------|-------------------|
| LVEF (%)                                              | 32.7 ± 14.9      | 57.0 ± 9.5        | <b>&lt;0.0001</b> |
| LVE > 112%, <i>n</i> (%)                              | 18 (85.7%)       | 11 (34.4%)        | <b>0.0002</b>     |
| LVEDD (mm)                                            | 61.3 ± 9.5       | 48.4 ± 10.0       | <b>&lt;0.0001</b> |
| Biomarkers                                            |                  |                   |                   |
| hs Troponin T (ng/L) ( <i>n</i> = 42)                 | 21.4 (13.9–34.7) | 13.2 (7.1–28.5)   | <b>0.046</b>      |
| elevated hs Troponin T, <i>n</i> (%) ( <i>n</i> = 42) | 11 (73.3%)       | 13 (46.4%)        | 0.090             |
| NT-proBNP (pg/mL) ( <i>n</i> = 41)                    | 1211 (542–2245)  | 89.6 (51.5–422.0) | <b>&lt;0.0001</b> |
| elevated NT-proBNP, <i>n</i> (%) ( <i>n</i> = 41)     | 16 (94.2%)       | 10 (41.7%)        | <b>0.0006</b>     |
| Implantable devices                                   |                  |                   |                   |
| ICD in primary PPX, <i>n</i> (%)                      | 13 (61.9%)       | 13 (40.6%)        | 0.130             |
| ICD in secondary PPX, <i>n</i> (%)                    | 6 (28.6%)        | 2 (6.3%)          | 0.047             |
| ICD/CRT-D implantation, <i>n</i> (%)                  | 19 (90.5%)       | 15 (46.9%)        | <b>0.001</b>      |
| Events during follow-up                               |                  |                   |                   |
| Malignant ventricular arrhythmia, <i>n</i> (%)        | 7 (33.3%)        | 6 (18.7%)         | 0.227             |
| Appropriate ICD shock, <i>n</i> (%)                   | 7 (36.8%)        | 4 (12.5%)         | 0.075             |
| RF ablation for VA, <i>n</i> (%)                      | 5 (23.8%)        | 2 (6.2%)          | 0.099             |
| Cardiopulmonary resuscitation, <i>n</i> (%)           | 0 (0%)           | 1 (3.1%)          | 0.413             |
| Sudden cardiac death, <i>n</i> (%)                    | 0 (0%)           | 1 (3.1%)          | 0.413             |
| End-stage heart failure, <i>n</i> (%)                 | 12 (57.1%)       | 2 (6.2%)          | <b>&lt;0.0001</b> |
| Heart transplantation, <i>n</i> (%)                   | 9 (42.0%)        | 2 (6.2%)          | <b>0.004</b>      |
| HF death, <i>n</i> (%)                                | 3 (14.3%)        | 0 (0%)            | 0.057             |

Legend: Number of subjects is expressed as *n* (%). Continuous variables are shown as mean ± SD or median and quartiles (Q1:25th–Q2:75th percentiles). AV block: atrioventricular block; CCD: cardiac conduction defect; CK: creatine phosphokinase; CRT-D: cardiac resynchronization therapy defibrillator; hs: high sensitive; ICD: implantable cardioverter defibrillator; LBBB: left bundle branch block; LVE: left ventricular enlargement; LVEDD: left ventricular end-diastolic dimension; LVEF: left ventricular ejection fraction; nsVT: non-sustained ventricular tachycardia; NT-proBNP: N-terminal pro-brain natriuretic peptide; NYHA class: New York Heart Association functional class; PPX: prophylaxis; RF ablation: radiofrequency ablation; SCA: sudden cardiac arrest; SCD: sudden cardiac death; sVT: sustained ventricular tachycardia; VA: ventricular arrhythmia.

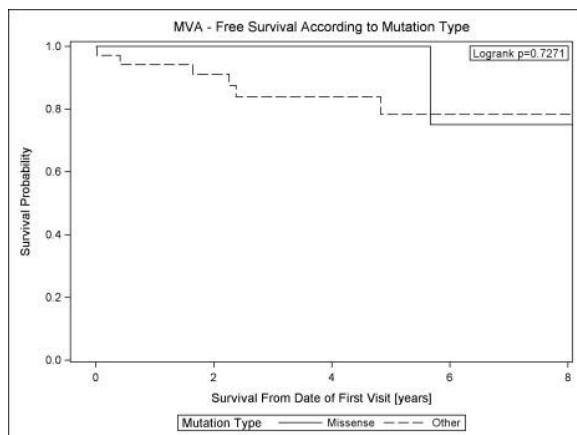

(a)

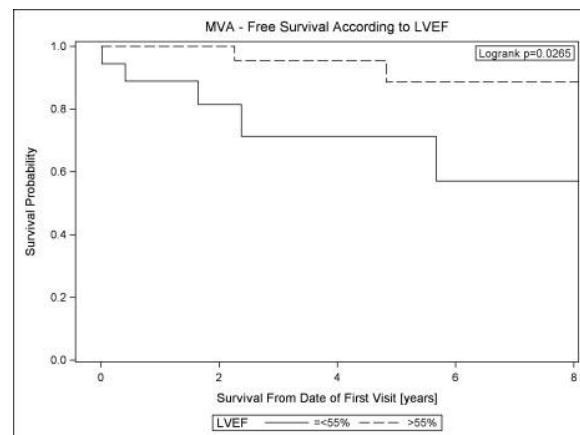

(b)

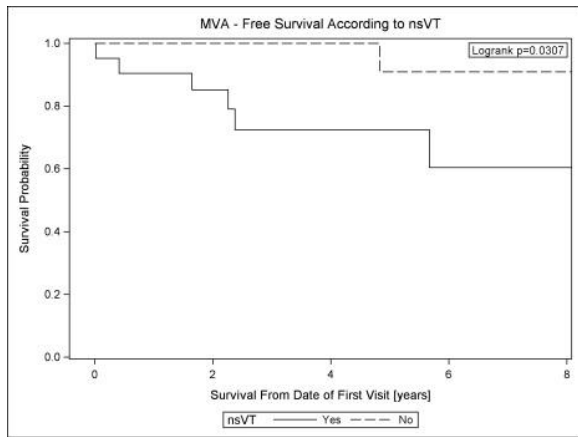

(c)

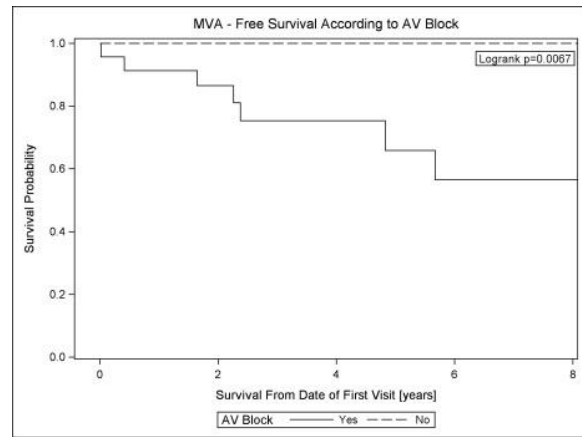

(d)

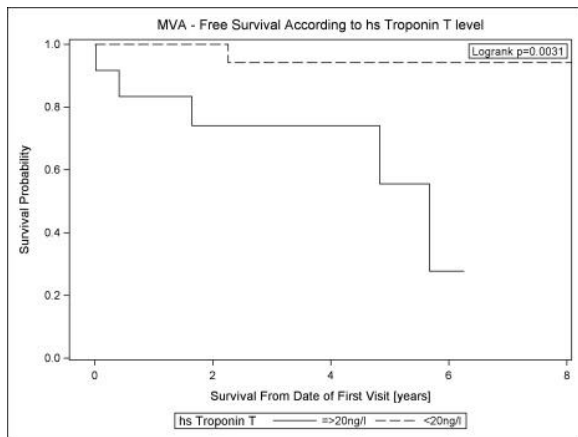

(e)

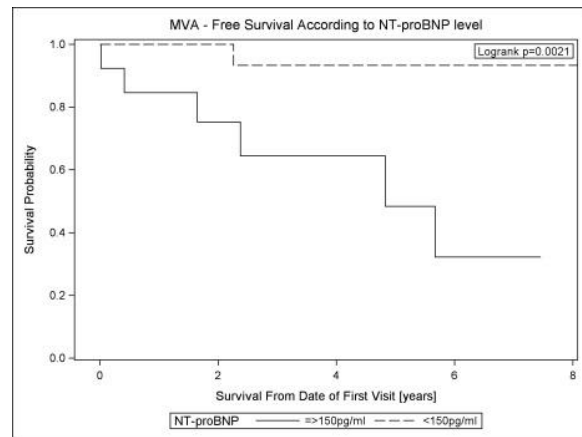

(f)

**Figure S7.** Kaplan–Meier MVA-free survival curves during follow-up in patients with cardiomyopathy and no prior history of sudden cardiac arrest or sustained ventricular tachycardia according to (a) mutation type; (b) LVEF; (c) nsVT; (d) AV block; (e) Hs troponin T level; and (f) NT-proBNP Level. Legend: AV block: atrioventricular block; hs: highly sensitive; LVEF: left ventricular ejection fraction; MVA: malignant ventricular arrhythmia; nsVT: nonsustained ventricular tachycardia; NT-proBNP: N-terminal prohormone brain natriuretic peptide.

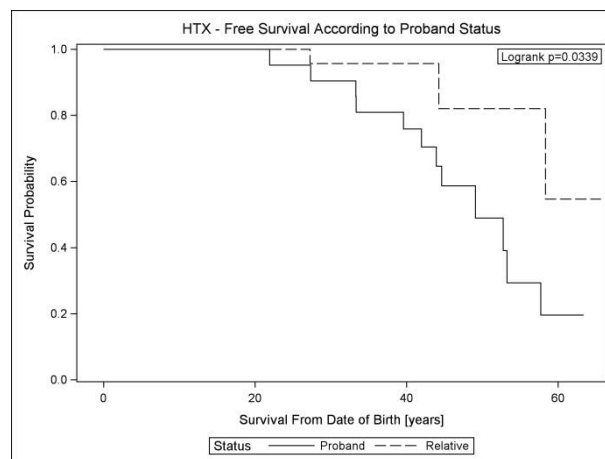

**Figure S8.** Kaplan–Meier lifelong HTX-free survival curves in cardiomyopathy according to proband status. Legend: HTX: heart transplantation.

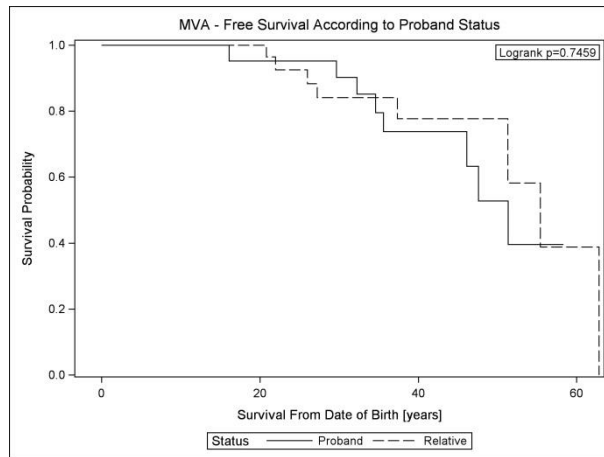

**Figure S9.** Kaplan–Meier lifelong MVA-free survival curves in cardiomyopathy according to proband status. Legend: MVA: malignant ventricular arrhythmia.
